# Supplementary material for: IgA autoantibodies target pulmonary surfactant in patients with severe COVID-19
Source: bioRxiv or medRxiv preprint supplement (doi:10.1101/2021.02.02.21250940), 2021-02-07
Supplement: Supplementary file [file media-1.pdf]

**Supplementary Table 1:** Characteristics of lung tissue samples

| <b>Patient no.</b> | <b>Cause of DAD</b>                                          |
|--------------------|--------------------------------------------------------------|
| 1                  | COVID-19                                                     |
| 2                  | COVID-19                                                     |
| 3                  | COVID-19                                                     |
| 4                  | COVID-19                                                     |
| 5                  | COVID-19                                                     |
| 6                  | COVID-19                                                     |
| 7                  | COVID-19                                                     |
| 8                  | COVID-19                                                     |
| 9                  | COVID-19                                                     |
| 10                 | COVID-19                                                     |
| 11                 | COVID-19                                                     |
| 12                 | Post-surgery of lung, lung cancer                            |
| 13                 | Drug toxicity (leukemia, complete remission)                 |
| 14                 | Drug toxicity (leukemia, complete remission)                 |
| 15                 | ICU stay (sepsis, drug toxicity)                             |
| 16                 | Resolved pneumonia                                           |
| 17                 | Post myocardial infarction, advanced cancer                  |
| 18                 | Drug toxicity (myelodysplastic syndrome)                     |
| 19                 | Drug toxicity (myelodysplastic syndrome, complete remission) |
| 20                 | Drug toxicity or viral infection                             |
| 21                 | Post myocardial infarction, advanced cancer                  |

Abbreviations: COVID-19 = Coronavirus Disease 2019, DAD = diffuse alveolar damage, ICU = intensive care unit, no. = number
