# Supplementary material for: IgA autoantibodies target pulmonary surfactant in patients with severe COVID-19
Source: bioRxiv or medRxiv preprint supplement (doi:10.1101/2021.02.02.21250940), 2021-02-07
Supplement: Supplementary file [file media-2.pdf]

Supplementary Fig. 2

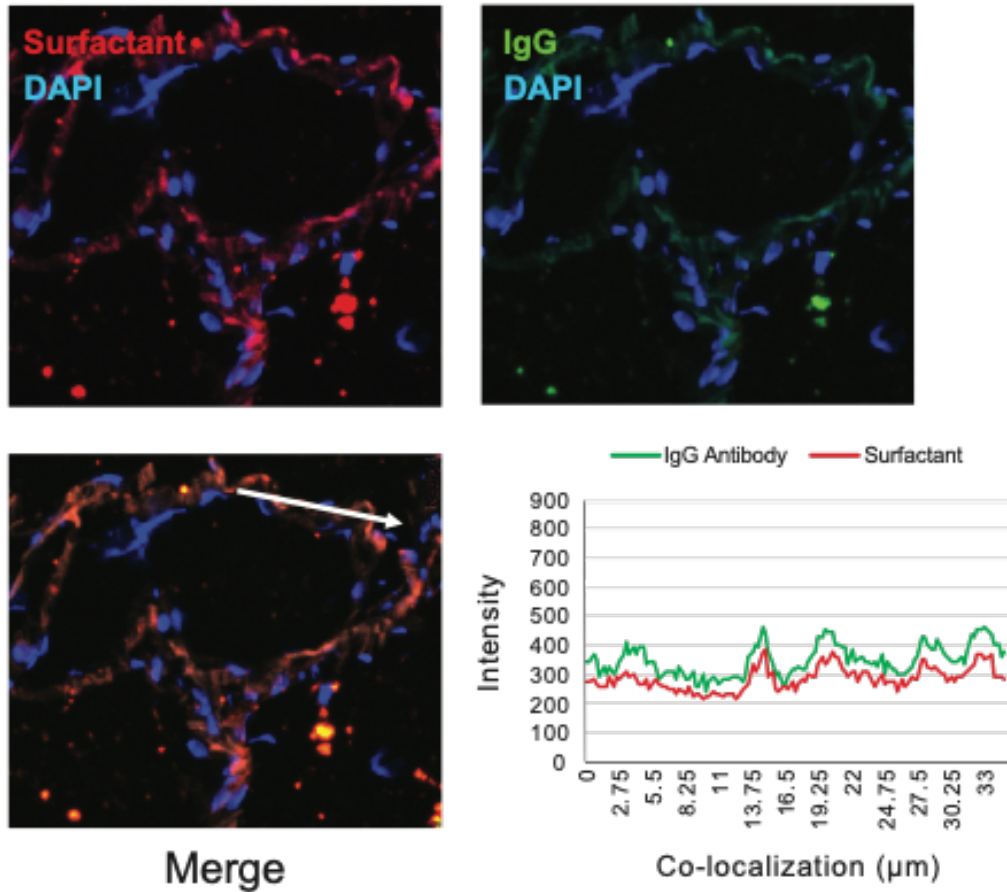

Immunofluorescence depicts colocalization of IgG and surfactant using plasma of severe COVID-19 patients, however less than IgA and surfactant (compare **Fig. 2c**). Colocalization distribution is presented in the lower right graph.
