# Supplementary material for: IgA autoantibodies target pulmonary surfactant in patients with severe COVID-19
Source: bioRxiv or medRxiv preprint supplement (doi:10.1101/2021.02.02.21250940), 2021-02-07
Supplement: Supplementary file [file media-3.pdf]

Supplementary Fig. 3

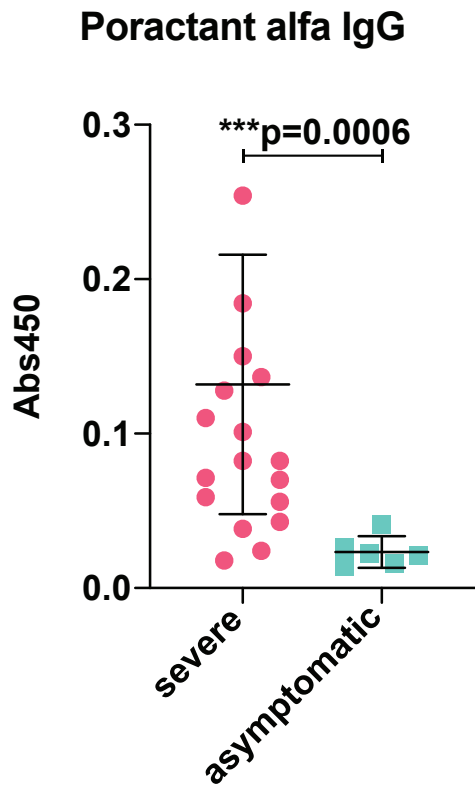

ELISA of IgG against poractant alfa (Curosurf®) shows a significant difference when comparing severe and asymptomatic patients ( $P=0.0006$ , Mann-Whitney U test).
