# Supplementary material for: IgA autoantibodies target pulmonary surfactant in patients with severe COVID-19
Source: bioRxiv or medRxiv preprint supplement (doi:10.1101/2021.02.02.21250940), 2021-02-07
Supplement: Supplementary file [file media-3.pdf]

**Supplementary Fig. 1**

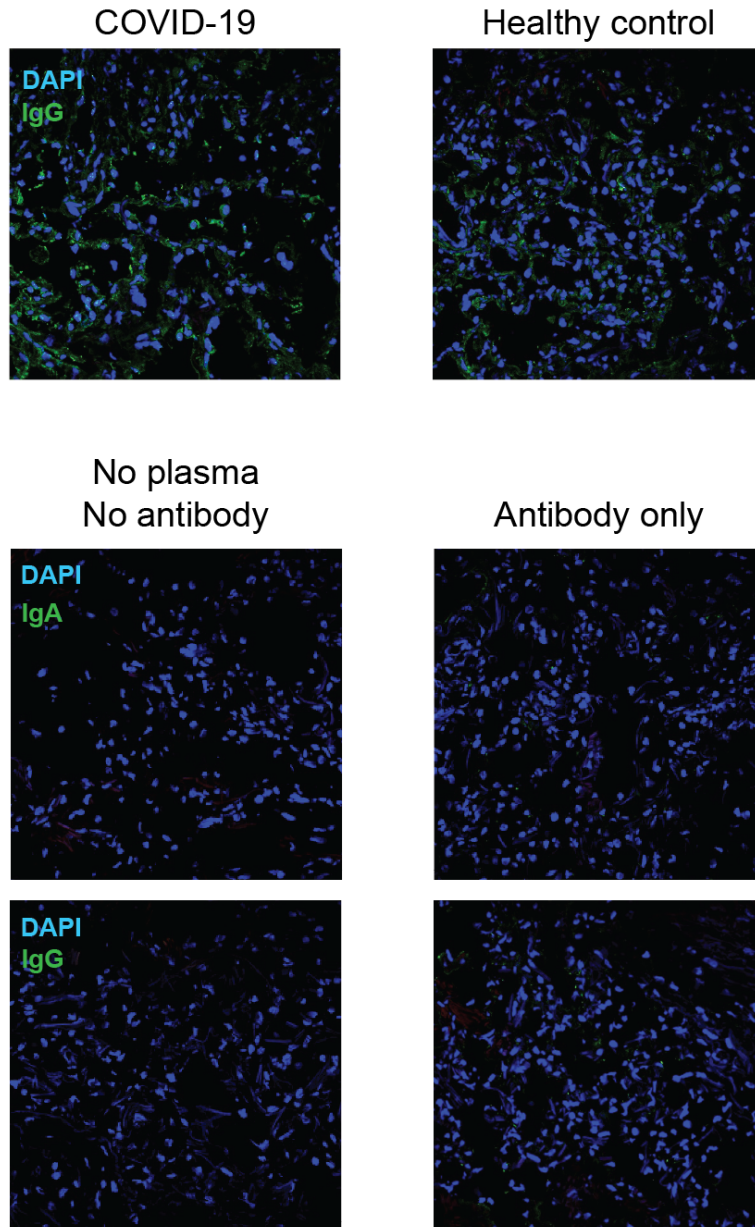

Upper panel: Indirect immunofluorescence of lung tissue shows less binding of IgG than IgA (see **Fig. 2a**). Lower panel: Control antibody stainings of IgA (top) and IgG (bottom).
