# Supplementary material for: IgA autoantibodies target pulmonary surfactant in patients with severe COVID-19
Source: bioRxiv or medRxiv preprint supplement (doi:10.1101/2021.02.02.21250940), 2021-02-07
Supplement: Supplementary file [file media-4.pdf]

Supplementary Figure 4

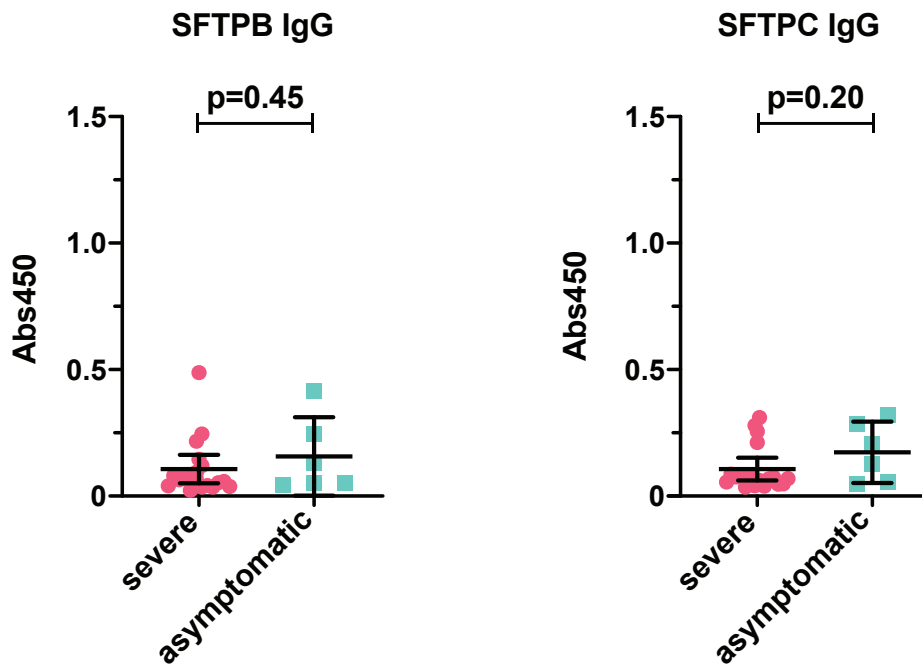

ELISA of IgG against surfactant proteins B (SFTPB) and C (SFTPC) show no significant differences when comparing severe and asymptomatic COVID-19 patients.
