# Supplementary material for: IgA autoantibodies target pulmonary surfactant in patients with severe COVID-19
Source: bioRxiv or medRxiv preprint supplement (doi:10.1101/2021.02.02.21250940), 2021-02-07
Supplement: Supplementary file [file media-6.pdf]

**Supplementary Table 2:** Patient demographics

| <b>Characteristic</b>               | <b>Critical Illness</b> | <b>Severe Illness</b> | <b>Asymptomatic</b> | <b>Total</b> |
|-------------------------------------|-------------------------|-----------------------|---------------------|--------------|
| Patient count n (% of total)        | 26 (57)                 | 13 (28)               | 7 (15)              | 46 (100)     |
| Mean Age (y, IQR)                   | 64 (57-70)              | 67 (65-74)            | 35 (34-38)          | 61 (55-70)   |
| Male sex - no. (%)                  | 20 (77)                 | 9 (69)                | 3 (43)              | 32 (70)      |
| Respiratory support (%)             | 26 (100)                | 13 (100)              | 0 (0)               | 39 (85)      |
| Supplementary oxygen only (%)       | 1 (4)                   | 7 (54)                | 0 (0)               | 8 (17)       |
| High-Flow (%)                       | 0 (0)                   | 6 (46)                | 0 (0)               | 6 (13)       |
| Non-invasive ventilation (%)        | 7 (27)                  | 0 (0)                 | 0 (0)               | 7 (15)       |
| Intubation (%)                      | 13 (50)                 | 0 (0)                 | 0 (0)               | 13 (28)      |
| ECMO (%)                            | 5 (19)                  | 0 (0)                 | 0 (0)               | 5 (11)       |
| Arterial Hypertension (%)           | 11 (42)                 | 6 (46)                | 0 (0)               | 17 (37)      |
| Coronary artery disease (%)         | 4 (15)                  | 2 (15)                | 0 (0)               | 6 (13)       |
| Diabetes mellitus Type 2 (%)        | 12 (46)                 | 6 (46)                | 0 (0)               | 18 (39)      |
| Autoimmune disease <sup>1</sup> (%) | 6 (23)                  | 2 (15)                | 0 (0)               | 8 (17)       |

<sup>1</sup>Autoimmune disease: Graves' disease (n=2), polymyalgia rheumatica (n=1). Abbreviations: ECMO = extracorporeal membrane oxygenation, IQR = interquartile range, y = years.
